# Supplementary material for: Identification of matrix-remodeling associated 5 as a possible molecular oncotarget of pancreatic cancer
Source: PubMed Central journal article supplement (PMC9958022; doi:10.1038/s41419-023-05684-5), 2023-02-24
Supplement: 41419_2023_5684_MOESM2_ESM.pdf [file 41419_2023_5684_MOESM2_ESM.pdf]

Please complete the table below to indicate the contributions of all named authors to the figures.

Figure 1:

|  |
|--|
|  |
|--|

Figure 2:

|  |
|--|
|  |
|--|

Figure 3:

|  |
|--|
|  |
|--|

Figure 4:

|  |
|--|
|  |
|--|

Figure 5:

|  |
|--|
|  |
|--|

Figure 6:

|  |
|--|
|  |
|--|

Signed for and on behalf of the Author(s):

Print Name:

Date:
